# Supplementary material
Source: PubMed Central journal article supplement (PMC3064214)

# **SUPPLEMENTARY INFORMATION**

**For**

## **Elevated miR-155 promotes inflammation in Cystic Fibrosis lung epithelial cells by driving hyper-expression of Interleukin-8**

**Sharmistha Bhattacharyya<sup>‡</sup>, Nagaraja Sethuraman Balakathiresan<sup>‡</sup>, Clifton Dalgard<sup>¶</sup>, Usha Gutti<sup>‡</sup>, David Armistead<sup>\*\*</sup>, Cathy Jozwik<sup>¶</sup>, Meera Srivastava<sup>¶</sup>, Harvey B. Pollard<sup>¶</sup> and Roopa Biswas<sup>‡1</sup>**

<sup>‡</sup>Department of Health Systems, Risk, and Contingency Management, Graduate School of Nursing, and<sup>¶</sup>Department of Anatomy, Physiology and Genetics, School of Medicine, Uniformed Services University of the Health Sciences, Bethesda, Maryland 20814. <sup>\*\*</sup> Applied Biosystems, Foster City, CA.

**Figure S1. Comprehensive analyses of CF-dependent gene expression known to be regulated by these CF-specific miRNAs:** The two major genes targeted by multiple miRNAs are ELL2 and Fam125b (Table 2). Relevantly, ELL2 is the elongation factor that can increase the catalytic rate of RNA polymerase II transcription by suppressing transient pausing by the polymerase at multiple sites along the DNA. The down-regulation of ELL2 expression by a miRNA-mediated mechanism emphasizes the functional role of miRNAs in the diseased state. Moreover, Fam125b is a component of the vesicular trafficking process, required for the sorting of endocytic ubiquitinated cargos into multivesicular bodies. TXNIP, a target gene of miR-301a, is a mediator of oxidative stress, by inhibiting thioredoxin activity or by limiting its bioavailability. SOX11, a target gene of miR-31 and miR-328, belongs to a family of transcription factors involved in the determination of cell fate. Moreover, TGF- $\beta$  signaling is affected by the concerted mis-expression of miRNAs in IB3-1 CF cells. Consistently, pathway analyses of miR-125a and miR-125b identifies a set of four target genes: TRAFD, GGT7, C5ORF13 and LRFN3 (marked with asterisks, supplemental Fig. S1A), down-regulated in the IB3-1 cells, that coordinately affect Toll like Receptor (TLR) and TGF $\beta$  signaling pathways. Relevant to the CF disease status, TRAFD has been implicated as a negative regulator of TLR4 signaling, while C5ORF13 is known to regulate TGF $\beta$ -signaling pathway. . Additionally, GGT7 and LRFN3 are involved in glutathione metabolism, and protein degradation tagging activity, respectively, both of which are key pathways in CF.

Additionally as summarized in supplemental Fig.S1B miR-27b, which is predicted to target TTP (ZFP36) mRNA, is up-regulated in IB3-1 cells. We also noted that miR-660 is down-regulated in IB3-1 cells compared to IB3-1/S9 CFTR-repaired cells, and the corresponding target IL-8 mRNA is up-regulated. Thus, miR-27b elevates IL-8 mRNA, by potentially destabilizing TTP mRNA, which leads to stabilizing IL-8 mRNA as shown in our earlier work (12). Additionally, over-expression of miR-660 in IB3-1 CF cells causes translational repression of IL-8 expression but does not affect IL-8 mRNA stability (Biswas and Bhattacharyya, personal communication).

**Figure S2. Effect of anti-miR-155 on miR-155 and IL-8 expression.** (A) IB3-1 CF cells were transfected with anti-miR-155 (Ambion, Inc.) or with negative control anti-miR. A dose of 150 nM was most effective in down-regulating miR-155. (B)The mRNA expression was analyzed by ILLUMINA bead chip arrays. The data was analyzed by IPA. The depicted networks (down-regulated genes are in green symbols and up-regulated genes in red symbols) indicate the attenuation of inflammation. While the expression of the pro-inflammatory genes, IL-8 and IL-6, are down-regulated, expression of the anti-inflammatory gene IL-10 is up-regulated.

Figure S1

A

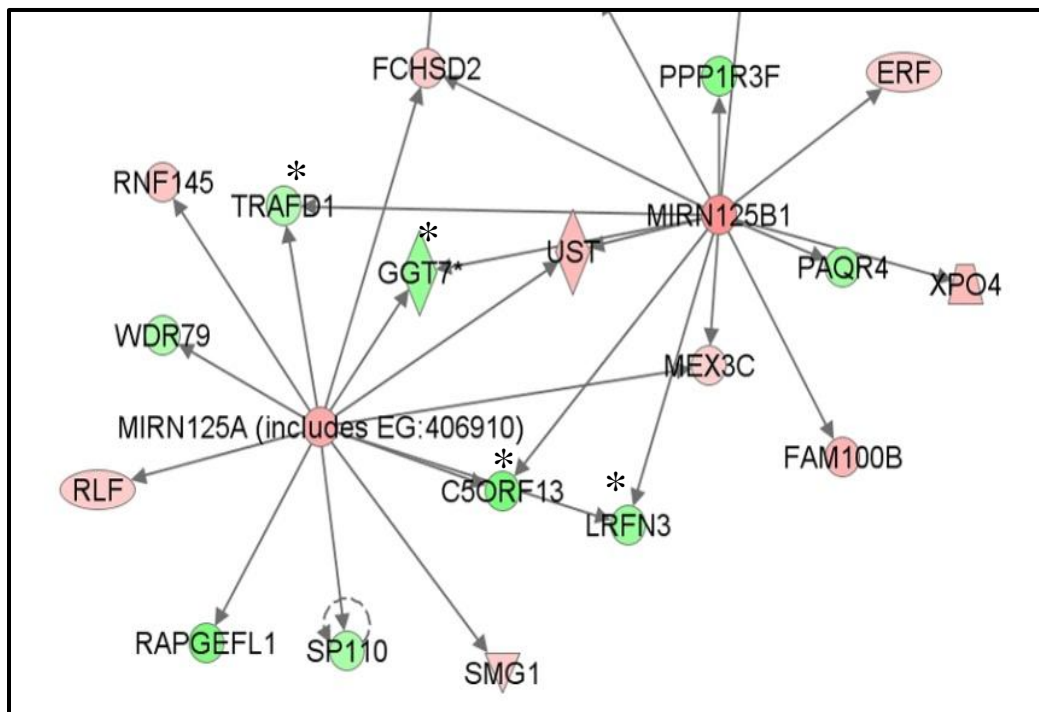

B

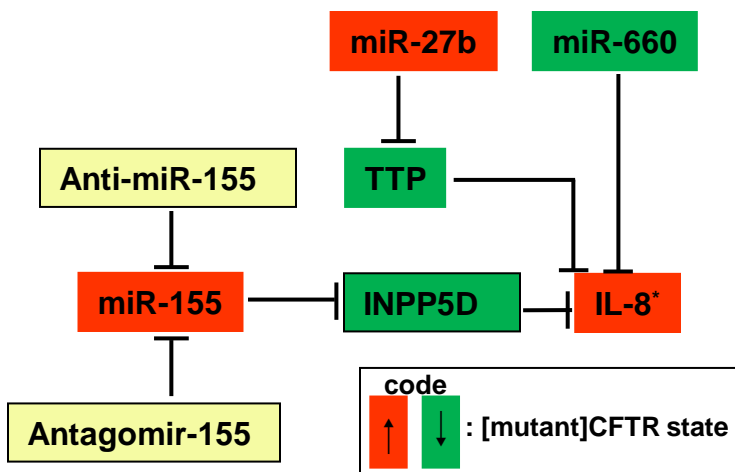

Figure S2

A

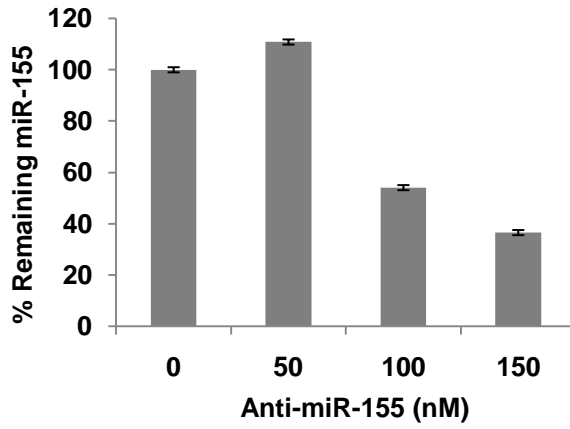

B

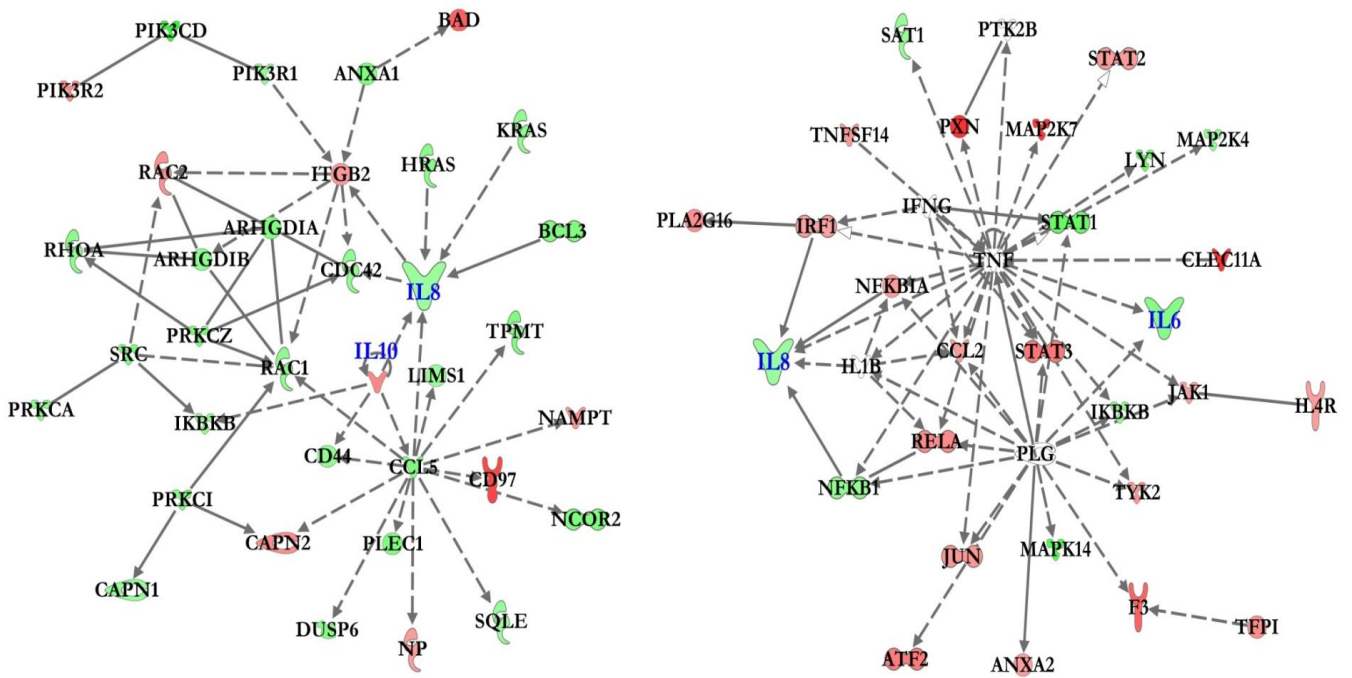

Supplement: supp_M110.198390_jbc.M110.198390-1.pdf [file supp_M110.198390_jbc.M110.198390-1.pdf]
